# Supplementary material
Source: HighWire-hosted journal article supplement (https://jnm.snmjournals.org/highwire/filestream/94421/field_highwire_adjunct_files/0/100248_Supplemental_Data.pdf)
Supplement: 100248_Supplemental_Data.pdf [file 100248_Supplemental_Data.pdf]

## Supplemental Figure - 1.

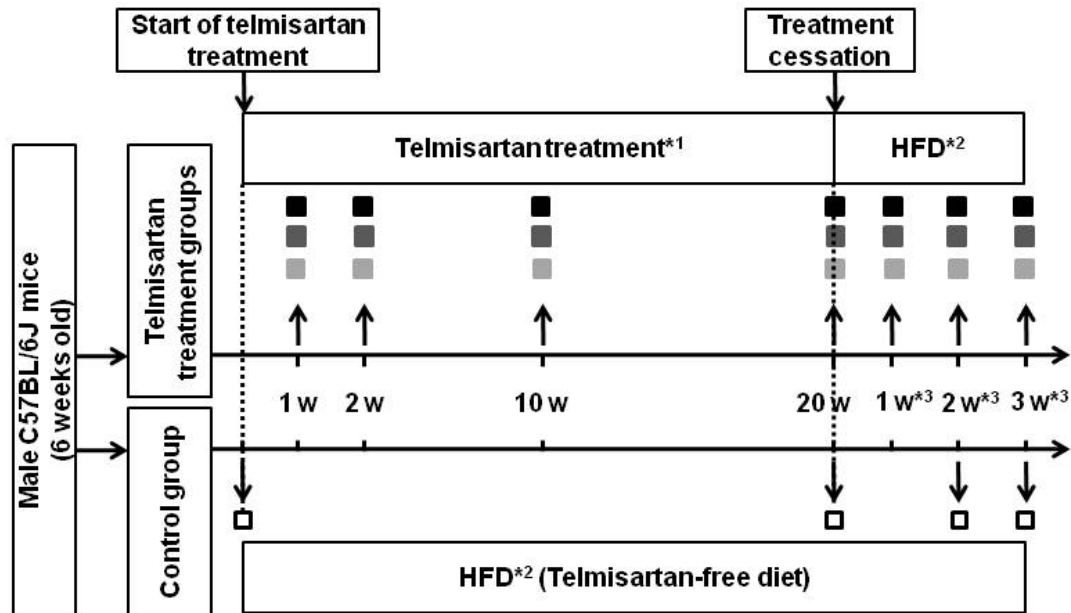

Experimental design and treatment schedule.

Telmisartan (high dose, 3 mg/kg/d; moderate dose, 0.66 mg/kg/d; low dose, 0.33 mg/kg/d) mixed in a high-fat diet was administered to 6-wk-old male C57BL/6J mice for 20 wk and then discontinued for 3 weeks. Mice on a telmisartan-free diet served as the control. The experimental time points for the high-dose group (■), moderate-dose group (■), low-dose group (■), and control group (□) are indicated ( $n = 5-10$ /time point). \*<sup>1</sup>, High-fat diet containing telmisartan. \*<sup>2</sup>, Telmisartan-free high-fat diet. \*<sup>3</sup>, Weeks after treatment cessation. At each time point, mice were sacrificed 2 h after the injection of <sup>18</sup>F-FDG to examine the following: (1) biodistribution of <sup>18</sup>F-FDG, (2) plasma BUN and creatinine levels, and (3) <sup>18</sup>F-FDG excretion by autoradiography of kidney sections.

## Supplemental Figure- 2.

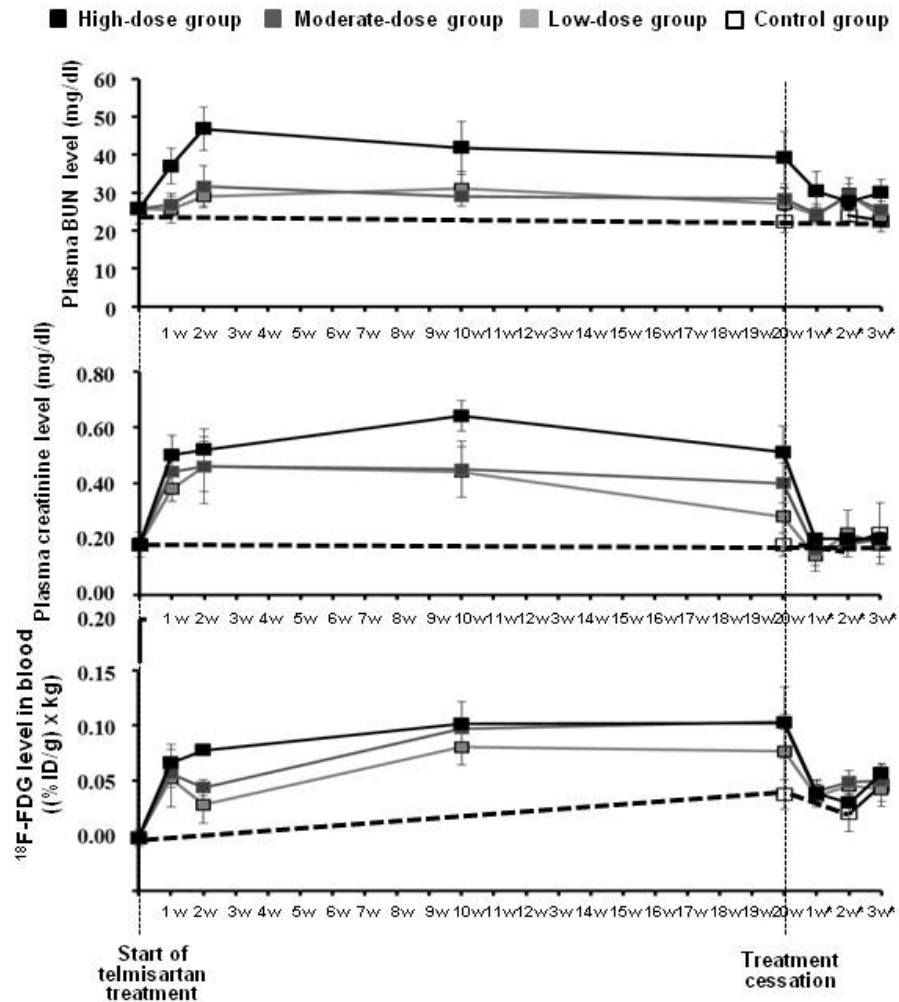

Sequential measurement of BUN, creatinine, and blood  $^{18}\text{F}$ -FDG levels.

Six-wk-old male C57BL/6J mice were given telmisartan (high dose, 3 mg/kg/d; moderate dose, 0.66 mg/kg/d; low dose: 0.33 mg/kg/d) mixed in a high-fat diet for 20 wk, then discontinued for 3 wk. Plasma BUN, plasma creatinine, and blood  $^{18}\text{F}$ -FDG levels were sequentially measured at each designated time point for the high-dose group (■), moderate-dose group (■), low-dose group (■), and control group (□) ( $n = 5\text{--}10/\text{time point}$ ). \*, Weeks after treatment cessation. In all the telmisartan-treated groups, BUN, creatinine, and  $^{18}\text{F}$ -FDG levels increased in the first 2 wk of the treatment and then remained the same thereafter. After the 3-wk treatment cessation, all of the parameters returned to the baseline levels.
